# Supplementary material
Source: bioRxiv or medRxiv preprint supplement (https://www.biorxiv.org/highwire/filestream/18574/field_highwire_adjunct_files/1/066399-2.pdf)
Supplement: Supplementary file [file 066399-2.pdf]

**A**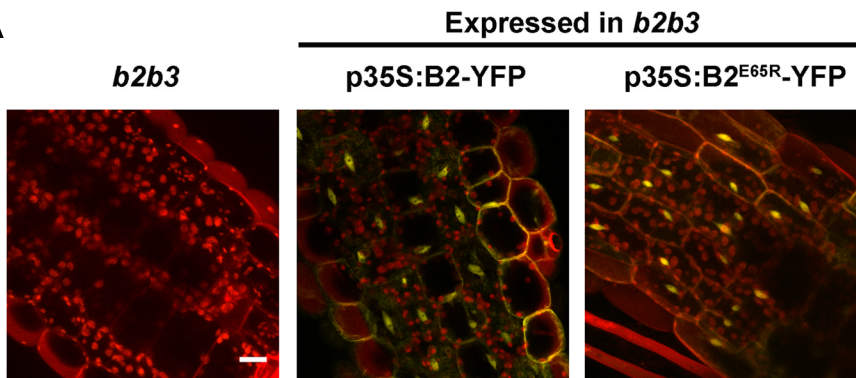**B**

# of leaves

at flowering

37 12

&gt;31

Expressed in *b2b3*

|               | Expressed in <i>b2b3</i> |   |                         |   |   |   |   |   |   |    |    |    |
|---------------|--------------------------|---|-------------------------|---|---|---|---|---|---|----|----|----|
|               | p35S:B2<br><i>b2b3</i>   |   | p35S:B2 <sup>E65R</sup> |   |   |   |   |   |   |    |    |    |
|               | 1                        | 2 | 3                       | 4 | 5 | 6 | 7 | 8 | 9 | 10 | 11 | 12 |
| anti-HA blot  |                          |   |                         |   |   |   |   |   |   |    |    |    |
| Ponceau stain |                          |   |                         |   |   |   |   |   |   |    |    |    |

**C**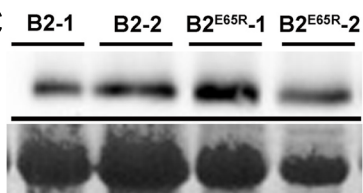

anti-HA blot

Ponceau stain
